# Supplementary material for: BinMat: A molecular genetics tool for processing binary data obtained from fragment analysis in R
Source: Biodivers Data J. 2022 Mar 11;10:e77875. doi: 10.3897/BDJ.10.e77875 (PMC8933389; doi:10.3897/BDJ.10.e77875)
Supplement: Supplementary material 4 — Tewes et al. (2018) AFLP binary data for native and invasive Bruniasorientalis species [file bdj-10-e77875-s004.nex]

#NEXUS
BEGIN Taxa;
DIMENSIONS NTAX = 179;
END;
BEGIN Characters;
DIMENSIONS NCHAR = 210;
FORMAT DATATYPE = STANDARD INTERLEAVE MISSING = ?;
MATRIX

AL_01 111110010110111110011110111011111011101100110110101000100110010001111001010010010110000001010000011111111001010011111111111101011100111010010100101010000111101100111101111110111111111001011001100010011111011101
AL_02 111110010111111111011110111111111001101100110110101000100100010001111001011000010110000000010000011111111001010010111111111101011100110010010110101010000111101100111001111110111111111001011011100010011111001101
AL_03 111110010111111111011110111011111001101100110110101000100110010001111001010000010110000000010000011111111001010010111111111101011100111000010110101010000111101100111101111110111111111001011011100010011111001101
AL_04 111110010110111111011110111011111001101100110110101000100110010001111001010010010110000000010010011111111001010010111111111101011100111000010100101010000111101100111101111110111111111001011011100010011111001101
AL_05 111110010111111110011110111011111001101100110110101000100100010001111001011000010110000000010000011111111001010010111111111101011100111000010110101010000111101100111001111110111111111001011011100010011111001101
AL_06 111110010110111110011110111011111001101110110110101001100110010001111001010000010110000000010010011111111001010011111111111101011100111010010100101010000111101100111111111110111111111001011011100010011111011101
AL_07 111110010110111110011110111111111001101100110110101000100100010001111001110010010110000000010010011111111001010010111111111101011100111000010110101010000111101100111001111110111111111001011011100010011111001101
AL_08 111110010111111110011110111111111001101100110110101000100110010001111001010000011110000000010000011111111001010010111111111101011100111000010100101010000111101100111001111110111111111001011011100010011111001101
AL_09 111110010111111111011110111111111001101100110110101000100110010001111001011000010110000000010000011111111001010010111111111101111100110010010110101010000111101100111101111110111111111001011001100010011111001101
AL_10 111110010111111111011110111111111001101100110110101000100110010001111001010000010110000000010000011111111001010010111111111101011100111000010110101010000111101100111101111110111111111001011011100010011111001101
AL_11 111110010111111110011110111011111001101100110110101000100110010001111001010000010110000000010000011111111001010010111111111101011100110010010100101010000111101100111001111110111111111001011011100010011111001101
AL_12 111110010110111110011110111011111001101100110110101000100110010001111001010010011110000000010010011111111001010010111111111101011100110010010110101010000111101100111101111110111111111001011011100010011111001101
CB_01 111110010110111110011110111011111001101101110110101000100110010000110001011000010110000010000100011101111001010010111111111101110100111100010100101010000111101100110101111110111111111101011001100110011111011101
CB_03 111110010110111110011110111011111001101101110110101000100110010000110001011000010110000010000000011101111101010010111111111101010100111100010100101010000111101000110101111110010111111001011101100010011111111101
CB_04 111110010110111110111110111011111001101101110111101000100100010000110001010000010110000010000000011101111101010111111111111101011100101001010110101010000111101100110001111110011111111001011011100010011111011101
CB_05 111110010110111110111110101011111001101101110110101000100110011000111101011000010110000011010010011101111101010110111111111101011100111100010110101010000111101100110101111110111111111001011001100111011111011101
CB_06 111110010110111110011110101011111001101101110111101000100100010001110001011000010110001000010000011111111101010010111111111101111100110100010100101010000111101100110101111110111111111001011011100011011111111101
CB_07 111110010110111110011110111011111001101101110111101000100100010000110001011000010110000010000000011111111101010110111111111101111100110001010110101010000111101100110101111110011111111001011001100010011111011101
CB_08 111110010111111110111110111011111001101100110111101000100110010001110001010000010110000010000010011101111001010110111111111101111100110100010100101010000111101000110001111110111111111001011011100011011111111101
CB_09 111110010110111110111110111011111001101101110110101000100100011000111001011000010110000010000100011101111001010110111111111101011100111100010111101010010111101000110001111110111111111001011011100110011111111101
CB_10 111110010110111110111110101011111001101101110110101000100100010000111101011000010110000000010000011111111001010011111111111101011100111100010110101010010111101100110101111110111111111001011011100010011111011101
CB_11 111110010110101110011110101011111001101101110111101000100110010000110101011000010110000010000000011101111101010110111111111101111100111001010100101010000111101100110101111110011111111001010011100010011111111101
CB_12 111110010110111110011110111011111001101101110110101000100100010000110001011000010110000010000100011111111101010110111111111101010100111001010111101010010111101100110101111110111111111001011011100010011111111101
CB_13 111110010110111110111110101011111001101101110110101100100100010000110001011000010110000010000100011111111001010111111111111101011100111001010111101010000111101100110101111110111111111001011001100111011111011101
CB_14 111110010110111110011110111011111001101101110110101000100110010001110001011000010110000010000000011111111001010110111111111101110100110100010101101010000111101000110101111110111111111001011001100010011111011101
CB_15 111110010110111110111110011011101001101101110110101000100100010000110001011000010110000010000000011111111101010111111111111101111100110001010100101010010111101000110001111110011111111001011011100010011111111101
CB_16 111110010110101110011110101011111001101101110111101000100110010000110001011000010110000010000000011101111001010010111111111101010100111100010100101010000111101100110101111110011111111001011001100110011111011101
CB_17 111110010110111110111110101011111001101101111110101001100100010000111001010000010110000000000110011101111101010111111111111101011101111101010110101010000111101100110001111110111111111001011001100110011111111101
CB_18 111110010110111110011110111011111001101101110110101000100100010000110001011000010110000010000010011111111101010010111111111101110100110100010110101010000111101100110101111110011111111001010011100110011111111101
CB_19 111110010110111110011110101011111001101101110110101000100100010000111001011000010110000010000100011101111101010011111111111101010100111100010110101010000111101100110101111110111111111001011001100010011111011101
CB_20 111110010110111110111110101011111001101101110110101000100110010000111001011000010110000000000100011101111101010011111111111101010100111000010110101010000111101100110101111110111111111001011001100010011111011101
CB_21 111110010110111110111110101011111001101101110110101000100110010000110001011000010110000001010110011111111101010111111111111101011100110100010100101010000111101100110101111110111111111001010001100010011111011101
CB_22 111110010110111110011110011011111001101101110110101000100100010000110001011000010110000010000000011111111101010010111111111101010100110101010100101010010111101100110101111110111111111001011011100010011111111101
CB_23 111110010110111110111110111011111001101101110111101000100100011000110001011000010110000000000110011101111101010010111111111101010100110100010110101010000111101000110101111110111111111001011001100010011111011101
CB_24 111110010110111110111110101011111001101101110110101000100110010000110001011000010110000010000000011101111101010111111111111101110100110101010110101010000111101100110101111110011111111001011011100010011111011101
CB_25 111110010110111110011110111011111001101101110110101000100110010000110001010000010110000000000110011111111101010110111111111101011100111001010100101010000111101000110001111110111111111001011001100110011111111101
CB_26 111110010110111110111110111011101001101101110110101000100110010000110001010000010110000010001010011101111001010111111111111101111100111001010100101010010111101000110101111110111111111001011011100011011111111101
CB_27 111110010110111110111110101011101001101101110111101000100110010100110001010000010110000010000000011101111001010110111111111101010100111100010101101010000111101100110001111110111111111001011001100010011111011101
CB_28 111110010111111110111110101011111001101101110111101000100110010000110001010000010110000010001010011111111001010110111111111101011100110100010110101010000111101100110101111110111111111001011101100010011111011101
CB_29 111110010110111110111110111011111001101101110110101000100100011000111001010000010110001010010000011111111101010110111111111101011100111100010110101010000111101100110101111110111111111001011001100010011111011101
CB_30 111110010110111110111110111011111001101101110110101000100100010000110001011000010110000000011000011111111101010011111111111101011100110101010100101010000111101100110101111110111111111001011011100010011111011101
CB_31 111110010110111110111110011011111001101101110111101000100100010000110001011000010110000010000100011111111101010110111111111101010100111001010101101010000111101000110101111110111111111001011011100010011111101101
CB_32 111110010110111110111110111011111001101101110111101000100110010000110001011000010110000010000010011111111101010110111111111101111100110101010110101010010111101100110101111110011111111001010011100010011111011101
CB_33 111110010110111110111110111011111001101101110111101000100100010000110001010000010110000010000010011111111001010011111111111101011100100101010110101010000111101100110101111110011111111001011011100010011111011101
CD_01 111110010110111110011110111011111001101101110110101000100100010000111001010000010110000000001010011101111001010011111111111101011100111100010110101010000111101100110001111110111111111001011001100111011111011101
CD_02 111110010111111110011110111011111001101101110110101000100110010000111001011000010110000010000010011101111001010110111111111101010101111000010110101010000111101100111101111110111111111001011011100011011111011101
CD_03 111110010110111110011110111001101001101101110110101000100110010001111001010000010110000010001010011111111101010011111111111101011100111000010110101010000111101100111001111110111111111001011001100011011111111101
CD_04 111110010110101110111110011011111001101101110110101000100110010000111001011000010110000010001010011101111001010110111111111101010101111000010110101010000111101100111101111110111111111001010011100110011111111101
CD_05 111110010110111110011110111011111001101101110111101000100100010001111001011000010110000010000010011101111001010010111111111101111100110001010110101010000111101100110101111110111111111001011001100111011111111101
CD_06 111110010110111110011110111011111001101101110110101000100110010001111001011000010110000010000010011101111001010011111111111101010101111100010110101010000111101100111101111110111111111001010011100010011111011101
CD_07 111110010110111110011110111001111001101101110110101000100100010001111001011000010110000010001010011101111001010111111111111101111101111001010110101010000111101100110101111110111111111001011011100111011111011100
CD_08 111110010110111110011110111011111001101101110111101100100100010000111001011000010110001010000010011101111001010111111111111101011100110101010110101010000111101100110001111110111111111101011011100010011111111101
CD_09 111110010110111110011110111011111001101101110110101000100100010000111001011000010110000010000010011101111001010011111111111101010101110001010110101010000111101100110101111110111111111001010011100011011111111101
CD_10 111110010110111110111110111011101001101101110110101000100100010000111001011000010110000010000010011101111001010010111111111101010101111001010110101010000111101100110101111110111111111001011011100111011111111101
CD_11 111110010110111110011110111011111001101101110110101000100110010000111001010000010110000010000010011111111101010011111111111101011100111001010110001010000111101100111001111110111111111001011011100111011111011101
CD_12 111110010110111110111110111011101001101111110110101000101110010000111001011000010110000010001010011111111101010011111111111101011100111000010110101010000111101100111101111110111111111001011001100011011111011101
CD_13 111110010110111110011110111011101001101101110110101000100110010000111001011000010110000010000010011101111001010011111111111101011101111001010110101010000111101100111101111110111111111101011011100010011111111100
CD_15 111110010110111110011110101001101001101101110110101000100110010000111001011000010110000010000000011101111001010011111111111101011101111001010110101010000111101100111101111110111111111001011011100111011111111101
CD_16 111110010110111110111110101011101001101101110110101000100110010000111001010000010110000010001000011101111001010010111111111101011101111000010110101010000111101100110001111110111111111001011001100110011111111101
CD_17 111110010110111110011110101011111001101101110110101000100110010000111001011000010110000010000000011101111001010110111111111101010100111001010110101010000111101100110101111110111111111001011011100111011111011101
CD_18 111110010110111110011110111001111001101101110110101000100100010001111001010000010110000010001010011101111001010011111111111101111101111001010110101010000111101100110001111110111111111001011011100111011111111100
CD_19 111110010110111110011110111011101001101101110110101000100110010000111001011000010110000010000010011101111001010010111111111101111100111001010110101010000111101100110101111110111111111101011001100011011111111101
CD_20 111110010110111110011110111011111001101101110110101000100100010000111001011010010110000010001010011101111001010010111111111101010101111000010110101010000111101100110101111110111111111001011011100111011111111100
CD_21 111110010110101110111110011011101001101101110110101000100110010000111001011000010110000010000010011101111001010110111111111101011100110001010110101010000111101100111101111110111111111001011011100011011111111101
CD_22 111110010110111110111110101011111001101101110110101000100100010000111001011000010110001010001000011101111001010010111111111101111101111001010110101010010111101100110001111110111111111101011011100110011111111101
CD_23 111110010110111110111110111011111001101101110110101000100110010000111001011000010110000010000010011101111001010010111111111101111100111000010110101010000111101100111101111110111111111001011011100010011111111101
CD_24 111110010110101110011110001011111001101101110110101000100110010000111001011000010110000010000000011101111001010010111111111101010101111001010110101010000111101100111101111110111111111001011011100111011111111100
DR_01 111110010110111110011110111011111001101101110110101000100100011001110001011010010111001000010010011111111001010011111111111101011100110010010100101110000111101100111101111110111111111001011011100010011111011100
DR_02 111110010111111110011110111011111001101100110110101000100110011001111001011010010111000001010010011111111001000011111111111101010100110010010100101110000111101100111001111110111111111001011011100010011111011101
DR_03 111110010110111110011110111011111001101100110110101000100100110001110001010010010111000000010010011111111001000010111111111101011100110010010110001110000111101100110101111110111111111001011011100010011111001101
DR_04 111110010110110110011110111011111001101100110110101000100110011001111001010010010110000000000010111111111001010110111111111101011100111000010100101010000111101100111101111110111111111001011001100010011111001101
DR_05 111110010111111110011110111011111001101101110110101000100110010001110001011010010111001000010010111111111001010010111111111101010100110010010110001110000111101100111101111110111111111001011011100010011111001101
DR_06 111110010110111110011110111011111001101100110110101000100110011001111001010010010111000001010010011111111001000010111111111101011100111000010110101110000111101100111101111110111111111001011011100010011111011101
DR_07 111110010110101110011110111011111001101100110110101000100110111001110001010010010111000000010010011111111001010011111111111101011100111010010100101110000111101000111101111110111111111001011011100010011111011100
DR_08 111110010110111110011110111011111001101100110110101000100110010001110001010010010110001000010010111111111001010111111111111101011100110010010110101110000111101100111101111110111111111001011011100010011111011101
DR_09 111110010111111110011110111011111001101101110110101000100100010001111001011010010110001001010010011111111001010111111111111101011100110010010100101010000111101100110101111110111111111001011011100010011111011101
DR_10 111110010110111110011110111011111001101100110110101000100110110001111001010010010111000000010010011111111011000010111111111101011100110010010110101110000111101100111101111110111111111001011011100010011111001101
DR_11 111110010110111110011110111011111001101100110110101000100110010001110001010010010111001000010010011111111011000011111111111101011100110010010110101110000111101100111101111110111111111001011011100010011111011100
DR_12 111110010110111110011110111011111001101101110110101000100110010001110001011010010111000000011010011111111001010010111111111101011100110010010110101110000111101100111101111110111111111001011011100010011111011101
DR_13 111110010111101110011110111011111001101100110110101000100110011001111001011010010111001001011010011111111001010010111111111101011100110010010100101110000111101100111101111110111111111001011001100010011111011101
DR_14 111110010110101110011110111011111001101101110110101000100100011001110001011010010111001001010010011111111001010011111111111101011100111010010100101110000111101000111101111110111111111001011011100010011111011101
DR_15 111110010110111110011110111011111001101100110110101000100110111001110001010010010111001000000010111111111001010010111111111101011100111010010100101110000111101100111101111110111111111001011001100010011111011100
DR_16 111110010111111110011110111011111001101100110110101000100110011001011001010010010111000000110110011111111001010111111111111101011100111110010110101110000111101101111101111110111011111000011011100010011111011100
DR_17 111110010110101110011110101011111001101101110110101000100110011001111001011010010111000100010010011111111001010010111111111101011100111010010100101110000111101100111111111110111111111001011011100010011111011101
DR_18 111110010111111110011110111011111001101100110110101000100110010001111001011010010111000001010010011111111001010010111111111101011100110011010100101110000111101100111001111110111111111001011011100010011111011101
DR_19 111110010111111110011110111011111001101100110110101000100110010000111001010000010111000001010010011111111001010010111111111101011100110011010100101110000111101100111101111110111111111001011001100010011111001101
DR_20 111110010111111110011110111011111001101100110110101000100100011001110001110010010111000001010010011111111001000010111111111101011100110010010100101110000111101000110101111110111111111001011001100010011111001101
DR_21 111110010110101110011110111011111001101100110110101000100110111001111001010010010111000000010010111111111001000010111111111101011100111010010100101110000111101100110111111110111111111001011011100010011111001100
T1_01 111110010110110110011110001011101001101100110110111000111111010000110011010100010110000000010001011111111011010010111111111101010101110000011100111010000111111100110001111110110111111101011011101010111111011101
T1_02 111110010110100110011110001011101001101100110110101000111111010000110011011000010110001000010010011101111011010010111111111101010100110000010101111010000111111100110001111110111111111101011111100011011111000101
T1_03 111110010110110110011111101011101011101100110110101000100110010000111011010000010110101000010000011101111001010010111111111101010101110000010101101010000111111100110001111010110111111001011011100010011111000101
T1_04 111110010110110110011111101011101011101100110110101000100100010000110011011000010110100000010000011101111001010010111111111101010100110000011100101010000111111100110001111110110111111101010011100010011111000101
T1_05 111110010110110110011110111011101001101100110110101000101111010000111001011000010110101000010010011110111011010010111111111111010101110000011101111010000111111101110001111110110111111101011011100010111111000101
T1_06 111110010110110110011111101011101001101100110110111100100101010000111001011000010110000000010010011101111001010010111111111101010101110000010101101010000111111100110001111110111111111101011011100010111111001101
T1_07 111110110110100110011110011011101011101100110110101000100100010000111001010000010110000000000010011111111001111010111111111111010101110000010100101010000111111100110001111110111111111101011111100010011111001101
T1_08 111110010110100110011110101011101001101100110110111100101100010000111011011000010110001000000010011101111001010010111111111101010101110000010100111010000111111101110001111110111111111001011011100011011111001101
T1_09 111110010110100110011110001011101001101100110110101000110101010000111011011000010110100000010000011111111001110010111111111101010101110000010101111010000111111101110001111110110111111111011011101011111111001101
T1_10 111110010110110110011110101011111001101100110110101000101101010000111001010000010110101000010010011101111001010010111111111111010101110000011100111010000111111100110001111110110111111111011011100011011111011101
T1_11 111110110110100110011110111011101001101100110110111000101111010000110011011000010110000000010010011111111011010010111111111101010101111000011100101010001111111100110001111110110111111111011111100011011111010101
T1_12 111110010110100110011110111011101001101100110110101100101111010000110001010000010110000000010000011101111011011010111111111101010101110000011100101010001111111100110001111110111111111111011011100011011111000101
T1_13 111110010110110110011110101011101001101100110110111000110101010000111011011000010110000000010000011101111001010010111111111101010101111000010100111010000111111101110001111110110111111001011011100010011111000101
T1_14 111110010110110110011110111011101011101100110011111000101100010000111001011000010110001000010010011111111011010010111111111101010100111000010100101010000111101101110001111110111111111001010011100010011111000101
T1_16 111110110110110110011110111011101011101100110110101000101101010000111011011000010110101000010000011101111011010010111111111101010101111000010100111010000111111100110001111110111111111001011111100011111111001101
T1_17 111110010110110110011110101011101001101100110110111000100110010000111011011000010110001000010010011111111011010010111111111101010101110000010101101010000111101100110001111110111111111101010011100010011111010101
T1_18 111110010110100110011110111011101001101100110110101000101111010000111011011000010110101000010010011111111001010010111111111111010101110000010101111010000111111101110001111110111111111101011011100010011111000101
T1_19 111110010110100110011110101011111101101100110111111000100111010000111001011000010110000000010010011101111001111010111111111101010101110000010101111010000111111100110001111110110111111101010011100011111111000101
T1_20 111110010110100110011111101011101001101100110110101100100100010000110011011000010110100000010010011101111001010010111111111101010101110000011100111010000111111100110001111110110111111101011011100010011111000101
T1_21 111110110110100110011110111011101011101100110110101000111101010110111011011000010110101000011010011101111001010010111111111111010101110000011100101010000111111100110001111110110111111111111111100010011111001101
T1_22 111110010110110110011110101011101011101100110110111000101101010000111011011000010110101000010010011111111001010010111111111101010101111000010100111010000111111100110001111110111111111101011011100011111111010101
T1_23 111110110110110110011111101011101011101100110110101000100101010000110011011000010110000000010010011111111001110010111111111101010101110000010101111010000111111101110001111110110111111101011011100011011111010101
T1_24 111110010110110110011110101011101001101100110110101000100100010000111011011000010110100000010000011101111001010010111111111101010101110000010100101010000111111110110001111110111111111101011011100011111111011101
T1_25 111110010110100110011110101011101001101100110110101000101111010000110001010000010110001000010000011111111011010010111111111101010101110000011101111010000111111100110001111110110111111111011011100011111111000101
T1_26 111110110110100110011110111011101001101100110111101000100101010000110001010000010110000000000010011101111001110010111111111101010101110000011101111010000111111101110001111110111111111101011111100011011111000101
T1_27 111110010110110110011110101011101011101100110110101100100110010000111011011000010110100000010010011111111001010010111111111101010101110000010100111010000111111100110001111010111111111011011011101010111111011101
T1_28 111110010110110110011110101011101001101100110110101000110100010000110011011000010110000000010010011111111001010010111111111101010100110000011100111010001111101100110001111110111111111101010011101010011111000101
T1_29 111110110110100110011110101011101011101100110110101000101101010000111011011000010110100000010010011101111001110010111111111101010101110000010100101010000111111101110001111110110111111101011011100011011111011101
T1_30 111110110110110110011110101011101011101100110110111000101101010000111011011000011110000000010000011111111011010010111111111101010101110000010101101010000111111100110001111110111111111101011011100010011111001101
T3_01 111110010110110110011110101011111011101100110110101000100101010110110011011100010110000000010000011111111001010010111111111101010101110000010101101010000111111100110001111110111111111101011011100010011111011101
T3_02 111110010110110110011110101011101011101100110110101000100101010110111011011000010110001000010010011111111011010010111111111101010101110000010100101010000111111100110001111110111111111101010011100011111111001101
T3_03 111110010110110110011110101011101011101100110110101000100101010000111011011000010110000000010000011111111001011010111111111101010111110000010100101010000111111101110001111110110111111111010111100010011111001101
T3_04 111110110110110110011110101011111111101100110110101000100101010000110011011000010110001000010000011111111001010010111111111101010101110000010101101010000111111100110001111110111111111101010111100011011111001111
T3_05 111110110110100110011110111011111101101100110110111000101100010000110011011000010110001000000010011111111001010010111111111101010101110000011100101010000111111100110001111110111111111101010111100011011111011101
T3_07 111110110110100110011110101011101011101100110110101000100100010000110011011000010110001000010010011111111001010010111111111101010101110000010101101010000111111100110001111110110111111101010111100011111111011111
T3_08 111110110110110110011110101011111011101100110110101000101101010000111011011100010110000000010000011101111101011010111111111101010101110000010100101010001111111101110001111111111111111101011111100010111111011101
T3_09 111110110110110110011110101011111011101100110110101100100100010000110011010000010110001000010000011111111011010010111111111101010101110000010101101010000111111100110001111110110111111101010111100010011111001101
T3_10 111110110110100110011110101011111101101100110110101100101100010000110011010000010110000000010000011111111001111010111111111101010100110000010100101010000111111100110001111110111111111101010011100011111111010101
T3_11 111110110110100110011110101011101011101100110110101100100100010000111011111000010110001000010010011111111001010010111111111101010101110000010100101010101111111100110001111110111111111001011111100010011111001101
T3_12 111110010110100110011110111011111111101100110110111000100100010000110011010000010110001000010010011111111011010010111111111101010101110000011101101010001111111101110001111110111111111101010011100011011111000101
T3_13 111110110110110110011110101011111111101100110110101000101100010000110011011000010110001000000010011111111001010010111111111101010101110000010101101010101111111100110001111110111111111101010111100011011111001101
T3_14 111110110110100110011110101011111111101100110110101000100100010000110011011000010110001000010010011111111001010010111111111101010101110000010101101010000111111100110001111110111111111001010111100011111111001101
T3_15 111110010110100110011110111011101011101100110110101000101101010000110011011000010110000000010010011111111011010010111111111101010101110000010100101010000111111100110001111110111111111001011011100010111111011101
T3_16 111110110110100110011110101011111111101100110110101000100100010000110011011000010110001000000010011111111001010010111111111101010101110000010100101010000111111100110001111110110111111101010111100011011111000111
T3_17 111110010110100110011110101011101001101100110110101000100101010000111011011000010110000000010010011101111001011010111111111111010101110000010100111010000111111101110001111110111111111101010011100010111111011101
T3_18 111110010110100110011110101011101001101100110111101000110101010000111011011000010110000000010010011111111011010010111111111101010101110000010100101010000111111101110001111110111111111101011011100010111111011101
T3_19 111110010110100110011110101011101011101100110110101000100101010000110011011100010110000000010010011111111001010010111111111101010101110000011100101010000111111101110001111110111111111101011011100011111111001101
T3_20 111110110110100110011110101011101011101100110110101000100100010000110011011000010110001000010010011111111001010010111111111101010101110000010101101010000111111100110001111110111111111101010111100011111111001101
T3_21 111110010110100110011110111011101011101100110110101000100101010000110011011000010110001000010000011101111001010010111111111101010101110000011100101010100111101101110001111110111111111101010111100011011111001101
T3_22 111110010110100110011110101011111011101100110110101000100101010000110011011000010110001000000010011111111001010010111111111101010101110000010101101010000111111100110001111110111111111101010011100011111111000101
T3_23 111110110110100110011110111011111111101100110110111000100101010000110011011100010110001000010000011111111001010010111111111101010101110000011101101010000111111100110001111111111111111101010111100011111111001111
T3_24 111110010110100110011110111011111101101100110110101000100101010000110011011000010110001000010010011111111001010010111111111101010101110000010101101010000111111100110001111110111111111001011011100011111111011101
T3_25 111110010110110110011110101011111011101100110110111000100101010000110011011000010110000000010010011101111001011010111111111101010101110000010100101010000111111100110001111110110111111001011111100010111111011101
T3_26 111110110110110110011110101011111011101100110110101000100111010000110011110000010110001000010000011111111001010010111111111101010101110000010100101010000111111100110001111110111111111101010111100011011111001101
T3_27 111111110110100110011110111011101011101100110110111000101101010000110011011000010110001100000000011111111001010010111111111101010101110000010101101010000111111110110001111110110111111101010111100010111111001111
T3_28 111110010110100110011110101011101011101100110110111000100100010010111011011000010110000000010000011111111001010010111111111101010101110000011100101010000111101100110001111110110111001101010111100011011111011101
T3_29 111110110110110110011110101011101011101100110110101000100111010000111011011000010110001000010000011111111001011010111111111111010111110000010100101010000111111101110001111110111111111111010111100011111111001101
T3_30 111110010110100110011110111011111001101100110110111000100101010000110011011000010110001000010001011111111001011010111111111101010101110000010101111010000111111110110001111110110111111101011011100010111111001101
T3_31 111110010110110110011110111011101001101100110110101000100111010100110011011000011110100000010010011111111001010010111111111101010101110000011100101010000111111101110001111110110111111101011011100011011111001101
T3_32 111111010110110110011110111011111111101100110110111000101101010110111011011000010110000000011010011111111011010010111111111101010101110000011100101010001111111101110001111110111111111111011111100011111111011101
T3_33 111110010110100110011110101011101011101100110110101000100101010110111001011000010110000000010000011111111001010010111111111101010101110000010100101010000111111101110001111110110111111101011111100010111111011101
T4_01 111110110110100110011110101011101101101100110110101000101101010000110011011000010110101000010010011111111001010010111111111101010101111000010100101010000111111100110001111010111111111011011111100011011111001101
T4_02 111110110110110110011111101011101001101100110110111000101111010000111011011000010110001000010000011111111001010010111111111101010101111000010100101010000111111100110001011110110111111111011111100011011111010101
T4_04 111110110110110110011111101011101001101100110110111000101111010000110001011000010110001000010010011111111001010010111111111101010101110000010101101010000111111100110001011110110111111011011111100011011111010101
T4_05 111110110110100110011110101011101011101100110110101000101101010000111011011000010110100000010000011101111001010010111111111101010101110000010100111010000111111100110001111110110111111111010111100011011111010101
T4_06 111110110110100110011110101011101001101100110110101100101111010000110001011000010110100000010010011111111001010010111111111101010101111000010101101010000111111100110001011110110111111011011111100011011111000101
T4_07 111110110110100110011110111011101001101100110110111000101111010000110001011000010110001000010010011101111001010010111111111101010101110000010101101010000111111100110001011110110111111011011111100010011111000101
T4_08 111110110110100110011110011011101101101100110110111000101101010000110011011000010110000000010010011101111001010010111111111101010101110000010101101010001111111101110001111110110111111101011111100011011111001101
T4_10 111110010110110110011111111011101001101100110110111100101111010000110011011000010110001000010010011111111001010010111111111101010101111000010100101010001111111100110001011110111111111011011011100011011111000101
T4_11 111110110110110110011110101011101001101100110110101000100101010000110011011000010110000000000010011101111001010010111111111101010101111000010101111010001111111100110001111110110111111101010111100011011111000101
T4_12 111110110110100110011110101011101001101100110110111100101101010000110001011000010110101000010010011111111001010010111111111101010101110000010101101010000111111100110001111110111111111011011111100011011111010101
T4_13 111110110110110110011111001011101101101100110110111100101101010000110011011000010110001000010010011101111001010010111111111101010101111000010100101010001111111100110001111010111111111011011111100010011111000101
T4_14 111110110110100110011110111011101001101100110110111100100101010000111001011000010110001000010010011101111001010010111111111101010101110000010101101010000111111101110001111110111111111101011111100010011111001101
T4_15 111110110110100110011110101011101001101100110110111000111111010000110011011000010110101000010010011101111001010010111111111101010111111000010101111010000111111101110001111110110111111111011111100011011111000101
T4_16 111110110110100110011110101011101001101100110110111000101111010000110001011000010110000000010010011111111001010010111111111101010101111000010100101010000111111100110001111110110111111011011111100011011111000101
T4_17 111110110110110110011110111011101001101100110110101000101100010000110011011000010110000000010000011111111001010010111111111101010101111000010100111010000111111101110001111110110111111101011011100011011111000101
T4_18 111110110110110110011111101011101001101100110110111000101111010000111011011000010110001000010000011111111001010010111111111101010101111000010100101010000111111100110001011110110111111111011111100011011111000101
T4_19 111110110110100110011110101011101001101100110110111000101101010000110011011000010110000000010010011111111001010010111111111101010101110000010101101010000111111101110001111110110111111101011111100011011111000101
T4_20 111110110110110110011111101011101001101100110110111000101101010000110011011000010110001000010000011101111001010010111111111101010101111000010101101010000111111100110001111010111111101011011111100010011111000101
T4_21 111110110110100110011110111011101001101100110110111000101101010000110011011000010110001000010010011111111001010010111111111101010101111000010100101010000111111101110001011110111111111101011111100011011111001101
T4_22 111110110110110110011110111011101011101100110110101000100101010000111011011000010110000000010010011101111001010010111111111101010101111000010100101010000111111100110001111110110111111101011011100010011111000101
T4_23 111110110110100110011110111011101001101100110110111000111101010000110001011000010110100000010010011111111001010010111111111101010101110000010101101010000111111100110001011010110111111011011111100011011111010101
T4_24 111110110110110110011111101011101101101100110110101000101101010000110011111000011110001000011000011111111001010010111111111101010100111000011100101010000111111100110001111110111111111111011111100011011111001101
T4_25 111110010110100110011110101011101001101100110110101000100111010000110001011000010110001000000010011111111001010010111111111101010101111000010101111010000111111101110001111110110111111101010011101010011111000101
T4_26 111110110110110110011111101011101101101100110110111000101101010000111011011000010110000000010001011111111001010010111111111101010101111000010100101010000111101100110001111110111111111101011111100010011111000101
T4_27 111110010110110110011111101011101101101100110110101000101111010000111011111000010110000100010010011111111001010010111111111101010101111000010100101010000111111101110001111110110111111111011011100011011111000101
T4_28 111110110110100110011110101011101101101100110110111000100101010000110001011000011110001000010010011111111001010010111111101101010101111000010101101010000111111100110001111110110111111101011111100011011111001101
T4_29 111110110110110110011111001011101101101100110110111000101101010000110001111000010110001000010000011111111001010010111111111101010101110000010100101010000111111100110001111010110111111011011111100010011111001101
T4_30 111110110110110110011111111011101001101100110110111000111111010000110001011000010110001000010000011111111101010010111111111101010101110000011101101010000111111100110001011110110111111111011111100010011111010101
T4_31 111110110110110110011111001011101001101100110110101000101101010000110111011000010110100000010010011101111001010010111111111101010101110000011101101010001111111101110001111110111111111111011111100011011111010101
T4_32 111110110110100110011110111011101111101100110110111000100101010000111001111100010110001000010001011101111001010010111111111101010101110000010101101110000111111101110001111110111111111101011111100010011111000101

;
END;
