# Supplementary material for: BinMat: A molecular genetics tool for processing binary data obtained from fragment analysis in R
Source: Biodivers Data J. 2022 Mar 11;10:e77875. doi: 10.3897/BDJ.10.e77875 (PMC8933389; doi:10.3897/BDJ.10.e77875)
Supplement: Supplementary material 6 — Tewes et al. (2018) consolidated binary matrix without groups [file bdj-10-e77875-s006.csv]

	X	X.1	X.2	X.3	X.4	X.5	X.6	X.7	X.8	X.9	X.10	X.11	X.12	X.13	X.14	X.15	X.16	X.17	X.18	X.19	X.20	X.21	X.22	X.23	X.24	X.25	X.26	X.27	X.28	X.29	X.30	X.31	X.32	X.33	X.34	X.35	X.36	X.37	X.38	X.39	X.40	X.41	X.42	X.43	X.44	X.45	X.46	X.47	X.48
AL_01+AL_02	1	1	1	1	1	0	0	1	0	1	1	?	1	1	1	1	1	?	0	1	1	1	1	0	1	1	1	?	1	1	1	1	1	0	?	1	1	0	1	1	0	0	1	1	0	1	1	0	1
AL_03+AL_04	1	1	1	1	1	0	0	1	0	1	1	?	1	1	1	1	1	1	0	1	1	1	1	0	1	1	1	0	1	1	1	1	1	0	0	1	1	0	1	1	0	0	1	1	0	1	1	0	1
AL_05+AL_06	1	1	1	1	1	0	0	1	0	1	1	?	1	1	1	1	1	0	0	1	1	1	1	0	1	1	1	0	1	1	1	1	1	0	0	1	1	0	1	1	?	0	1	1	0	1	1	0	1
AL_07+AL_08	1	1	1	1	1	0	0	1	0	1	1	?	1	1	1	1	1	0	0	1	1	1	1	0	1	1	1	1	1	1	1	1	1	0	0	1	1	0	1	1	0	0	1	1	0	1	1	0	1
AL_09+AL_10	1	1	1	1	1	0	0	1	0	1	1	1	1	1	1	1	1	1	0	1	1	1	1	0	1	1	1	1	1	1	1	1	1	0	0	1	1	0	1	1	0	0	1	1	0	1	1	0	1
AL_11+AL_12	1	1	1	1	1	0	0	1	0	1	1	?	1	1	1	1	1	0	0	1	1	1	1	0	1	1	1	0	1	1	1	1	1	0	0	1	1	0	1	1	0	0	1	1	0	1	1	0	1
CB_01+CB_03	1	1	1	1	1	0	0	1	0	1	1	0	1	1	1	1	1	0	0	1	1	1	1	0	1	1	1	0	1	1	1	1	1	0	0	1	1	0	1	1	0	1	1	1	0	1	1	0	1
CB_04+CB_05	1	1	1	1	1	0	0	1	0	1	1	0	1	1	1	1	1	0	1	1	1	1	1	0	1	?	1	0	1	1	1	1	1	0	0	1	1	0	1	1	0	1	1	1	0	1	1	?	1
CB_06+CB_07	1	1	1	1	1	0	0	1	0	1	1	0	1	1	1	1	1	0	0	1	1	1	1	0	1	?	1	0	1	1	1	1	1	0	0	1	1	0	1	1	0	1	1	1	0	1	1	1	1
CB_08+CB_09	1	1	1	1	1	0	0	1	0	1	1	?	1	1	1	1	1	0	1	1	1	1	1	0	1	1	1	0	1	1	1	1	1	0	0	1	1	0	1	1	0	?	1	1	0	1	1	?	1
CB_10+CB_11	1	1	1	1	1	0	0	1	0	1	1	0	1	?	1	1	1	0	?	1	1	1	1	0	1	0	1	0	1	1	1	1	1	0	0	1	1	0	1	1	0	1	1	1	0	1	1	?	1
CB_12+CB_13	1	1	1	1	1	0	0	1	0	1	1	0	1	1	1	1	1	0	?	1	1	1	1	0	1	?	1	0	1	1	1	1	1	0	0	1	1	0	1	1	0	1	1	1	0	1	1	0	1
CB_14+CB_15	1	1	1	1	1	0	0	1	0	1	1	0	1	1	1	1	1	0	?	1	1	1	1	0	?	1	1	0	1	1	1	?	1	0	0	1	1	0	1	1	0	1	1	1	0	1	1	0	1
CB_16+CB_17	1	1	1	1	1	0	0	1	0	1	1	0	1	?	1	1	1	0	?	1	1	1	1	0	1	0	1	0	1	1	1	1	1	0	0	1	1	0	1	1	0	1	1	1	?	1	1	?	1
CB_18+CB_19	1	1	1	1	1	0	0	1	0	1	1	0	1	1	1	1	1	0	0	1	1	1	1	0	1	?	1	0	1	1	1	1	1	0	0	1	1	0	1	1	0	1	1	1	0	1	1	0	1
CB_20+CB_21	1	1	1	1	1	0	0	1	0	1	1	0	1	1	1	1	1	0	1	1	1	1	1	0	1	0	1	0	1	1	1	1	1	0	0	1	1	0	1	1	0	1	1	1	0	1	1	0	1
CB_22+CB_23	1	1	1	1	1	0	0	1	0	1	1	0	1	1	1	1	1	0	?	1	1	1	1	0	?	1	1	0	1	1	1	1	1	0	0	1	1	0	1	1	0	1	1	1	0	1	1	?	1
CB_24+CB_25	1	1	1	1	1	0	0	1	0	1	1	0	1	1	1	1	1	0	?	1	1	1	1	0	1	?	1	0	1	1	1	1	1	0	0	1	1	0	1	1	0	1	1	1	0	1	1	0	1
CB_26+CB_27	1	1	1	1	1	0	0	1	0	1	1	0	1	1	1	1	1	0	1	1	1	1	1	0	1	?	1	0	1	1	1	0	1	0	0	1	1	0	1	1	0	1	1	1	0	1	1	?	1
CB_28+CB_29	1	1	1	1	1	0	0	1	0	1	1	?	1	1	1	1	1	0	1	1	1	1	1	0	1	?	1	0	1	1	1	1	1	0	0	1	1	0	1	1	0	1	1	1	0	1	1	?	1
CB_30+CB_31	1	1	1	1	1	0	0	1	0	1	1	0	1	1	1	1	1	0	1	1	1	1	1	0	?	1	1	0	1	1	1	1	1	0	0	1	1	0	1	1	0	1	1	1	0	1	1	?	1
CB_32+CB_33	1	1	1	1	1	0	0	1	0	1	1	0	1	1	1	1	1	0	1	1	1	1	1	0	1	1	1	0	1	1	1	1	1	0	0	1	1	0	1	1	0	1	1	1	0	1	1	1	1
CD_01+CD_02	1	1	1	1	1	0	0	1	0	1	1	?	1	1	1	1	1	0	0	1	1	1	1	0	1	1	1	0	1	1	1	1	1	0	0	1	1	0	1	1	0	1	1	1	0	1	1	0	1
CD_03+CD_04	1	1	1	1	1	0	0	1	0	1	1	0	1	?	1	1	1	0	?	1	1	1	1	0	?	1	1	0	?	1	1	?	1	0	0	1	1	0	1	1	0	1	1	1	0	1	1	0	1
CD_05+CD_06	1	1	1	1	1	0	0	1	0	1	1	0	1	1	1	1	1	0	0	1	1	1	1	0	1	1	1	0	1	1	1	1	1	0	0	1	1	0	1	1	0	1	1	1	0	1	1	?	1
CD_07+CD_08	1	1	1	1	1	0	0	1	0	1	1	0	1	1	1	1	1	0	0	1	1	1	1	0	1	1	1	0	?	1	1	1	1	0	0	1	1	0	1	1	0	1	1	1	0	1	1	?	1
CD_09+CD_10	1	1	1	1	1	0	0	1	0	1	1	0	1	1	1	1	1	0	?	1	1	1	1	0	1	1	1	0	1	1	1	?	1	0	0	1	1	0	1	1	0	1	1	1	0	1	1	0	1
CD_11+CD_12	1	1	1	1	1	0	0	1	0	1	1	0	1	1	1	1	1	0	?	1	1	1	1	0	1	1	1	0	1	1	1	?	1	0	0	1	1	0	1	1	?	1	1	1	0	1	1	0	1
CD_13+CD_15	1	1	1	1	1	0	0	1	0	1	1	0	1	1	1	1	1	0	0	1	1	1	1	0	1	?	1	0	?	1	1	0	1	0	0	1	1	0	1	1	0	1	1	1	0	1	1	0	1
CD_16+CD_17	1	1	1	1	1	0	0	1	0	1	1	0	1	1	1	1	1	0	?	1	1	1	1	0	1	0	1	0	1	1	1	?	1	0	0	1	1	0	1	1	0	1	1	1	0	1	1	0	1
CD_18+CD_19	1	1	1	1	1	0	0	1	0	1	1	0	1	1	1	1	1	0	0	1	1	1	1	0	1	1	1	0	?	1	1	?	1	0	0	1	1	0	1	1	0	1	1	1	0	1	1	0	1
CD_20+CD_21	1	1	1	1	1	0	0	1	0	1	1	0	1	?	1	1	1	0	?	1	1	1	1	0	?	1	1	0	1	1	1	?	1	0	0	1	1	0	1	1	0	1	1	1	0	1	1	0	1
CD_22+CD_23	1	1	1	1	1	0	0	1	0	1	1	0	1	1	1	1	1	0	1	1	1	1	1	0	1	?	1	0	1	1	1	1	1	0	0	1	1	0	1	1	0	1	1	1	0	1	1	0	1
DR_01+DR_02	1	1	1	1	1	0	0	1	0	1	1	?	1	1	1	1	1	0	0	1	1	1	1	0	1	1	1	0	1	1	1	1	1	0	0	1	1	0	1	1	0	?	1	1	0	1	1	0	1
DR_03+DR_04	1	1	1	1	1	0	0	1	0	1	1	0	1	1	?	1	1	0	0	1	1	1	1	0	1	1	1	0	1	1	1	1	1	0	0	1	1	0	1	1	0	0	1	1	0	1	1	0	1
DR_05+DR_06	1	1	1	1	1	0	0	1	0	1	1	?	1	1	1	1	1	0	0	1	1	1	1	0	1	1	1	0	1	1	1	1	1	0	0	1	1	0	1	1	0	?	1	1	0	1	1	0	1
DR_07+DR_08	1	1	1	1	1	0	0	1	0	1	1	0	1	?	1	1	1	0	0	1	1	1	1	0	1	1	1	0	1	1	1	1	1	0	0	1	1	0	1	1	0	0	1	1	0	1	1	0	1
DR_09+DR_10	1	1	1	1	1	0	0	1	0	1	1	?	1	1	1	1	1	0	0	1	1	1	1	0	1	1	1	0	1	1	1	1	1	0	0	1	1	0	1	1	0	?	1	1	0	1	1	0	1
DR_11+DR_12	1	1	1	1	1	0	0	1	0	1	1	0	1	1	1	1	1	0	0	1	1	1	1	0	1	1	1	0	1	1	1	1	1	0	0	1	1	0	1	1	0	?	1	1	0	1	1	0	1
DR_13+DR_14	1	1	1	1	1	0	0	1	0	1	1	?	1	0	1	1	1	0	0	1	1	1	1	0	1	1	1	0	1	1	1	1	1	0	0	1	1	0	1	1	0	?	1	1	0	1	1	0	1
DR_15+DR_16	1	1	1	1	1	0	0	1	0	1	1	?	1	1	1	1	1	0	0	1	1	1	1	0	1	1	1	0	1	1	1	1	1	0	0	1	1	0	1	1	0	0	1	1	0	1	1	0	1
DR_17+DR_18	1	1	1	1	1	0	0	1	0	1	1	?	1	?	1	1	1	0	0	1	1	1	1	0	1	?	1	0	1	1	1	1	1	0	0	1	1	0	1	1	0	?	1	1	0	1	1	0	1
DR_19+DR_20	1	1	1	1	1	0	0	1	0	1	1	1	1	1	1	1	1	0	0	1	1	1	1	0	1	1	1	0	1	1	1	1	1	0	0	1	1	0	1	1	0	0	1	1	0	1	1	0	1
T1_01+T1_02	1	1	1	1	1	0	0	1	0	1	1	0	1	?	0	1	1	0	0	1	1	1	1	0	0	0	1	0	1	1	1	0	1	0	0	1	1	0	1	1	0	0	1	1	0	1	1	0	1
T1_03+T1_04	1	1	1	1	1	0	0	1	0	1	1	0	1	1	0	1	1	0	0	1	1	1	1	1	1	0	1	0	1	1	1	0	1	0	1	1	1	0	1	1	0	0	1	1	0	1	1	0	1
T1_05+T1_06	1	1	1	1	1	0	0	1	0	1	1	0	1	1	0	1	1	0	0	1	1	1	1	?	1	?	1	0	1	1	1	0	1	0	0	1	1	0	1	1	0	0	1	1	0	1	1	0	1
T1_07+T1_08	1	1	1	1	1	0	?	1	0	1	1	0	1	0	0	1	1	0	0	1	1	1	1	0	?	?	1	0	1	1	1	0	1	0	?	1	1	0	1	1	0	0	1	1	0	1	1	0	1
T1_09+T1_10	1	1	1	1	1	0	0	1	0	1	1	0	1	?	0	1	1	0	0	1	1	1	1	0	?	0	1	0	1	1	1	?	1	0	0	1	1	0	1	1	0	0	1	1	0	1	1	0	1
T1_11+T1_12	1	1	1	1	1	0	?	1	0	1	1	0	1	0	0	1	1	0	0	1	1	1	1	0	1	1	1	0	1	1	1	0	1	0	0	1	1	0	1	1	0	0	1	1	0	1	1	0	1
T1_13+T1_14	1	1	1	1	1	0	0	1	0	1	1	0	1	1	0	1	1	0	0	1	1	1	1	0	1	?	1	0	1	1	1	0	1	0	?	1	1	0	1	1	0	0	1	1	0	?	1	?	1
T1_16+T1_17	1	1	1	1	1	0	?	1	0	1	1	0	1	1	0	1	1	0	0	1	1	1	1	0	1	?	1	0	1	1	1	0	1	0	?	1	1	0	1	1	0	0	1	1	0	1	1	0	1
T1_18+T1_19	1	1	1	1	1	0	0	1	0	1	1	0	1	0	0	1	1	0	0	1	1	1	1	0	1	?	1	0	1	1	1	?	1	?	0	1	1	0	1	1	0	0	1	1	0	1	1	?	1
T1_20+T1_21	1	1	1	1	1	0	?	1	0	1	1	0	1	0	0	1	1	0	0	1	1	1	1	?	1	?	1	0	1	1	1	0	1	0	?	1	1	0	1	1	0	0	1	1	0	1	1	0	1
T1_22+T1_23	1	1	1	1	1	0	?	1	0	1	1	0	1	1	0	1	1	0	0	1	1	1	1	?	1	0	1	0	1	1	1	0	1	0	1	1	1	0	1	1	0	0	1	1	0	1	1	0	1
T1_24+T1_25	1	1	1	1	1	0	0	1	0	1	1	0	1	?	0	1	1	0	0	1	1	1	1	0	1	0	1	0	1	1	1	0	1	0	0	1	1	0	1	1	0	0	1	1	0	1	1	0	1
T1_26+T1_27	1	1	1	1	1	0	?	1	0	1	1	0	1	?	0	1	1	0	0	1	1	1	1	0	1	?	1	0	1	1	1	0	1	0	?	1	1	0	1	1	0	0	1	1	0	1	1	?	1
T1_28+T1_29	1	1	1	1	1	0	?	1	0	1	1	0	1	?	0	1	1	0	0	1	1	1	1	0	1	0	1	0	1	1	1	0	1	0	?	1	1	0	1	1	0	0	1	1	0	1	1	0	1
T1_30+T3_01	1	1	1	1	1	0	?	1	0	1	1	0	1	1	0	1	1	0	0	1	1	1	1	0	1	0	1	0	1	1	1	?	1	0	1	1	1	0	1	1	0	0	1	1	0	1	1	0	1
T3_02+T3_03	1	1	1	1	1	0	0	1	0	1	1	0	1	1	0	1	1	0	0	1	1	1	1	0	1	0	1	0	1	1	1	0	1	0	1	1	1	0	1	1	0	0	1	1	0	1	1	0	1
T3_04+T3_05	1	1	1	1	1	0	1	1	0	1	1	0	1	?	0	1	1	0	0	1	1	1	1	0	1	?	1	0	1	1	1	1	1	1	?	1	1	0	1	1	0	0	1	1	0	1	1	0	1
T3_07+T3_08	1	1	1	1	1	0	1	1	0	1	1	0	1	?	0	1	1	0	0	1	1	1	1	0	1	0	1	0	1	1	1	?	1	0	1	1	1	0	1	1	0	0	1	1	0	1	1	0	1
T3_09+T3_10	1	1	1	1	1	0	1	1	0	1	1	0	1	?	0	1	1	0	0	1	1	1	1	0	1	0	1	0	1	1	1	1	1	?	?	1	1	0	1	1	0	0	1	1	0	1	1	0	1
T3_11+T3_12	1	1	1	1	1	0	?	1	0	1	1	0	1	0	0	1	1	0	0	1	1	1	1	0	1	?	1	0	1	1	1	?	1	?	1	1	1	0	1	1	0	0	1	1	0	1	1	0	1
T3_13+T3_14	1	1	1	1	1	0	1	1	0	1	1	0	1	?	0	1	1	0	0	1	1	1	1	0	1	0	1	0	1	1	1	1	1	1	1	1	1	0	1	1	0	0	1	1	0	1	1	0	1
T3_15+T3_16	1	1	1	1	1	0	?	1	0	1	1	0	1	0	0	1	1	0	0	1	1	1	1	0	1	?	1	0	1	1	1	?	1	?	1	1	1	0	1	1	0	0	1	1	0	1	1	0	1
T3_17+T3_18	1	1	1	1	1	0	0	1	0	1	1	0	1	0	0	1	1	0	0	1	1	1	1	0	1	0	1	0	1	1	1	0	1	0	0	1	1	0	1	1	0	0	1	1	0	1	1	?	1
T3_19+T3_20	1	1	1	1	1	0	?	1	0	1	1	0	1	0	0	1	1	0	0	1	1	1	1	0	1	0	1	0	1	1	1	0	1	0	1	1	1	0	1	1	0	0	1	1	0	1	1	0	1
T3_21+T3_22	1	1	1	1	1	0	0	1	0	1	1	0	1	0	0	1	1	0	0	1	1	1	1	0	1	?	1	0	1	1	1	?	1	0	1	1	1	0	1	1	0	0	1	1	0	1	1	0	1
T3_23+T3_24	1	1	1	1	1	0	?	1	0	1	1	0	1	0	0	1	1	0	0	1	1	1	1	0	1	1	1	0	1	1	1	1	1	1	?	1	1	0	1	1	0	0	1	1	0	1	1	0	1
T3_25+T3_26	1	1	1	1	1	0	?	1	0	1	1	0	1	1	0	1	1	0	0	1	1	1	1	0	1	0	1	0	1	1	1	1	1	0	1	1	1	0	1	1	0	0	1	1	0	1	1	0	1
T3_27+T3_28	1	1	1	1	1	?	?	1	0	1	1	0	1	0	0	1	1	0	0	1	1	1	1	0	1	?	1	0	1	1	1	0	1	0	1	1	1	0	1	1	0	0	1	1	0	1	1	0	1
T3_29+T3_30	1	1	1	1	1	0	?	1	0	1	1	0	1	?	0	1	1	0	0	1	1	1	1	0	1	?	1	0	1	1	1	?	1	0	?	1	1	0	1	1	0	0	1	1	0	1	1	0	1
T3_31+T3_32	1	1	1	1	1	?	0	1	0	1	1	0	1	1	0	1	1	0	0	1	1	1	1	0	1	1	1	0	1	1	1	?	1	?	?	1	1	0	1	1	0	0	1	1	0	1	1	0	1
T3_33+T4_01	1	1	1	1	1	0	?	1	0	1	1	0	1	0	0	1	1	0	0	1	1	1	1	0	1	0	1	0	1	1	1	0	1	?	?	1	1	0	1	1	0	0	1	1	0	1	1	0	1
T4_02+T4_04	1	1	1	1	1	0	1	1	0	1	1	0	1	1	0	1	1	0	0	1	1	1	1	1	1	0	1	0	1	1	1	0	1	0	0	1	1	0	1	1	0	0	1	1	0	1	1	0	1
T4_05+T4_06	1	1	1	1	1	0	1	1	0	1	1	0	1	0	0	1	1	0	0	1	1	1	1	0	1	0	1	0	1	1	1	0	1	0	?	1	1	0	1	1	0	0	1	1	0	1	1	0	1
T4_07+T4_08	1	1	1	1	1	0	1	1	0	1	1	0	1	0	0	1	1	0	0	1	1	1	1	0	?	1	1	0	1	1	1	0	1	?	0	1	1	0	1	1	0	0	1	1	0	1	1	0	1
T4_10+T4_11	1	1	1	1	1	0	?	1	0	1	1	0	1	1	0	1	1	0	0	1	1	1	1	?	1	?	1	0	1	1	1	0	1	0	0	1	1	0	1	1	0	0	1	1	0	1	1	0	1
T4_12+T4_13	1	1	1	1	1	0	1	1	0	1	1	0	1	?	0	1	1	0	0	1	1	1	1	?	?	0	1	0	1	1	1	0	1	?	0	1	1	0	1	1	0	0	1	1	0	1	1	0	1
T4_14+T4_15	1	1	1	1	1	0	1	1	0	1	1	0	1	0	0	1	1	0	0	1	1	1	1	0	1	?	1	0	1	1	1	0	1	0	0	1	1	0	1	1	0	0	1	1	0	1	1	0	1
T4_16+T4_17	1	1	1	1	1	0	1	1	0	1	1	0	1	?	0	1	1	0	0	1	1	1	1	0	1	?	1	0	1	1	1	0	1	0	0	1	1	0	1	1	0	0	1	1	0	1	1	0	1
T4_18+T4_19	1	1	1	1	1	0	1	1	0	1	1	0	1	?	0	1	1	0	0	1	1	1	1	?	1	0	1	0	1	1	1	0	1	0	0	1	1	0	1	1	0	0	1	1	0	1	1	0	1
T4_20+T4_21	1	1	1	1	1	0	1	1	0	1	1	0	1	?	0	1	1	0	0	1	1	1	1	?	1	?	1	0	1	1	1	0	1	0	0	1	1	0	1	1	0	0	1	1	0	1	1	0	1
T4_22+T4_23	1	1	1	1	1	0	1	1	0	1	1	0	1	?	0	1	1	0	0	1	1	1	1	0	1	1	1	0	1	1	1	0	1	0	?	1	1	0	1	1	0	0	1	1	0	1	1	0	1
T4_24+T4_25	1	1	1	1	1	0	?	1	0	1	1	0	1	?	0	1	1	0	0	1	1	1	1	?	1	0	1	0	1	1	1	0	1	?	0	1	1	0	1	1	0	0	1	1	0	1	1	0	1
T4_26+T4_27	1	1	1	1	1	0	?	1	0	1	1	0	1	1	0	1	1	0	0	1	1	1	1	1	1	0	1	0	1	1	1	0	1	1	0	1	1	0	1	1	0	0	1	1	0	1	1	0	1
T4_28+T4_29	1	1	1	1	1	0	1	1	0	1	1	0	1	?	0	1	1	0	0	1	1	1	1	?	?	0	1	0	1	1	1	0	1	1	0	1	1	0	1	1	0	0	1	1	0	1	1	0	1
T4_30+T4_31	1	1	1	1	1	0	1	1	0	1	1	0	1	1	0	1	1	0	0	1	1	1	1	1	?	?	1	0	1	1	1	0	1	0	0	1	1	0	1	1	0	0	1	1	0	1	1	0	1
[truncated: 161 more columns]
